# Supplementary material
Source: bioRxiv or medRxiv preprint supplement (https://medrxiv.org/highwire/filestream/80136/field_highwire_adjunct_files/6/2020.05.06.20089573-7.pdf)

**Supplementary Figure 7.** This scatterplot demonstrates the relationship between SARS-CoV-2 RNA cycle threshold (Ct) value and body temperature at admission for patients with (i.e. the case group defined by nasopharyngeal swab PCR positivity; solid circles) and without (i.e. the control group; open diamonds) recurrence of PCR positivity. The vertical dotted line represents the threshold of high body temperature ( $> 37.2\text{ }^{\circ}\text{C}$ ).

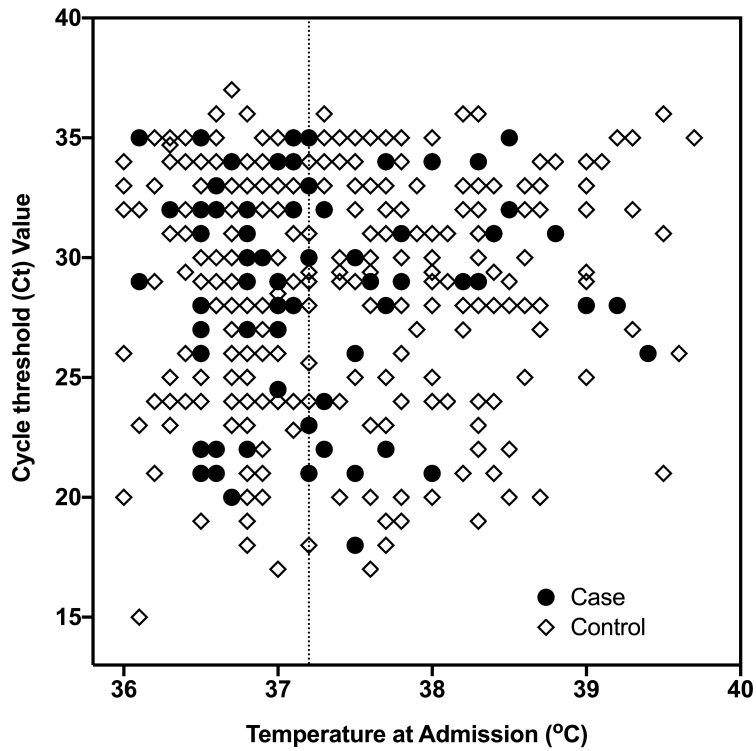

Supplement: Supplementary file [file 2020.05.06.20089573-7.pdf]
